# Supplementary material for: SARS-CoV-2 Prevalence and Variant Surveillance among Cats in Pittsburgh, Pennsylvania, USA
Source: MDPI journal article supplement (doi:10.3390/v15071493), 2023-06-30
Supplement: s1 [file s1]

# Supplementary Materials:

**Table S1.** Detection of SARS-CoV-2 antibodies in cats using sVNT, pVNT and eLFA.

| S.no | ID      | sVNT posi-<br>tive | NT <sub>50</sub> titer (Pseudovirus neutralization) |        |        |        |        |         | pVNT<br>status | eLFA re-<br>sults |
|------|---------|--------------------|-----------------------------------------------------|--------|--------|--------|--------|---------|----------------|-------------------|
|      |         |                    | Wuhan                                               | Alpha  | Beta   | Gamma  | Delta  | Omicron |                |                   |
| 1    | E - 5   | 93.82              | 2133                                                | 6233   | 1915   | 1971   | 3527   | 1369    | Pos            | Pos               |
| 2    | D 12    | 45.09              | -                                                   | -      | -      | -      | 66.17  | 36.07   | Pos            | Pos               |
| 3    | F 13    | 95.02              | 1091                                                | 3856   | 917.5  | 1263   | 2024   | 259.2   | Pos            | Pos               |
| 4    | F 7     | 90.13              | 740.1                                               | 1569   | 577.4  | 507.2  | 1073   | 628.8   | Pos            | Neg               |
| 5    | F 4     | 52.17              | -                                                   | 43.24  | -      | -      | 109.4  | -       | Pos            | Pos               |
| 6    | D 9     | 64.62              | 163.2                                               | 141    | 49.68  | 37.03  | 500.1  | -       | Pos            | Pos               |
| 7    | F 12    | 90.43              | 1372                                                | 3141   | 795.1  | 1368   | 3888   | 579.8   | Pos            | Pos               |
| 8    | C - 22a | 42.67              | -                                                   | 34.75  | -      | -      | 118.6  | -       | Pos            | Pos               |
| 9    | M       | 46.05              | 36.56                                               | -      | -      | -      | -      | -       | Pos            | Neg               |
| 10   | N       | 32.86              | -                                                   | -      | -      | -      | 34.66  | -       | Pos            | Neg               |
| 11   | V1      | 34.35              | -                                                   | -      | -      | 32.46  | -      | -       | Pos            | Neg               |
| 12   | V2      | 34.35              | -                                                   | -      | -      | -      | -      | 32.53   | Pos            | Neg               |
| 13   | C - 22b | 94.76              | 328.7                                               | 186.6  | 168.6  | 151.9  | 752.2  | 378     | Pos            | Pos               |
| 14   | U       | 30.70              | -                                                   | -      | -      | -      | -      | -       |                | Neg               |
| 15   | Y       | 31.67              | -                                                   | -      | -      | -      | -      | -       |                | Neg               |
| 16   | I       | 95.68              | 405.30                                              | 273.8  | 177.6  | 238.6  | 560.7  | 510.7   | Pos            | Pos               |
| 17   | CC      | 50.45              | -                                                   | -      | -      | -      | -      | -       |                | Neg               |
| 18   | C-10    | 39.89              | -                                                   | -      | -      | -      | 31.86  | -       | Pos            | Neg               |
| 19   | J       | 30.63              | -                                                   | -      | -      | -      | -      | -       |                | Pos               |
| 20   | EE      | 35.32              | -                                                   | -      | -      | -      | -      | -       |                | Neg               |
| 21   | H       | 33.61              | -                                                   | -      | -      | -      | -      | -       |                | Neg               |
| 22   | C       | 30.03              | -                                                   | -      | -      | -      | -      | -       |                | Neg               |
| 23   | J-24    | 82.38              | 120.6                                               | 165.3  | 134.9  | 190.2  | 103.3  | -       | Pos            | Pos               |
| 24   | H-19    | 86.51              | 393.9                                               | 183.0  | 577.1  | 219.3  | 111.2  | 41.7    | Pos            | Pos               |
| 25   | H-7     | 95.27              | 1770.0                                              | 1805.0 | 1544.0 | 2238.0 | 3804.0 | 718.7   | Pos            | Pos               |
| 26   | H-2     | 95.37              | 3953.0                                              | 2202.0 | 1902.0 | 1947.0 | 3918.0 | 623.8   | Pos            | Pos               |
| 27   | H-20    | 50.65              | 57.5                                                | 30.3   | 39.4   | 48.1   | 193.0  | -       | Pos            | Neg               |
| 28   | E-15    | 79.15              | 347.6                                               | 150.9  | 104.5  | 151.1  | 597.6  | 80.0    | Pos            | Pos               |
| 29   | C-33    | 87.54              | 61.16                                               | -      | -      | 36.17  | 148.1  | 54.26   | Pos            | Neg               |
| 30   | NN      | 31.37              | -                                                   | -      | -      | -      | -      | -       |                | Neg               |
| 31   | O       | 31.67              | -                                                   | -      | -      | -      | -      | -       |                | Neg               |

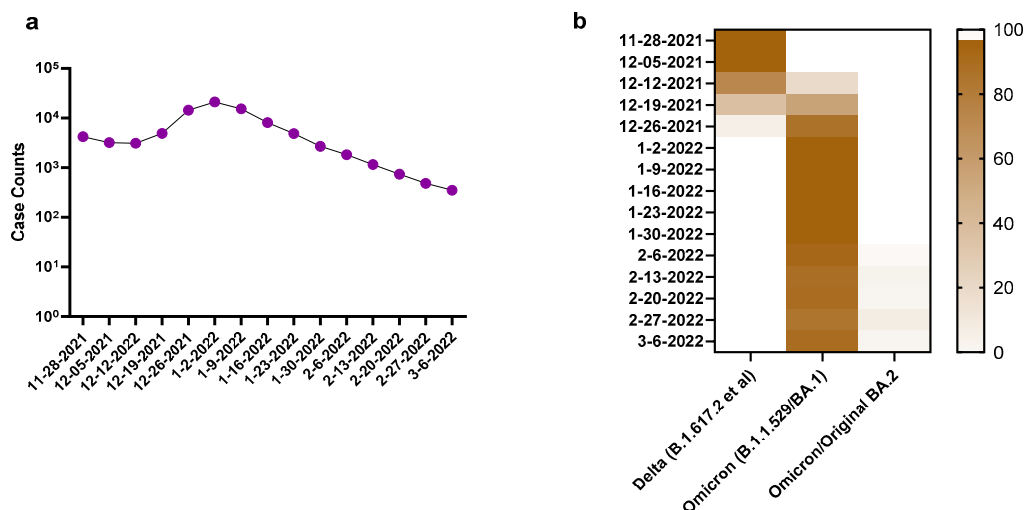

**Figure S1. a.** The number of confirmed SARS-CoV-2 cases per day in Allegheny County in humans at the time of sampling (December 4, 2021 to March 3, 2022) [1]. **b.** Heatmap with the percentage of confirmed SARS-CoV-2 variants in humans (scale represents 0 to 100%) [2].

## References

1. COVID-19 in Allegheny County. [https://tableau.alleghenycounty.us/t/PublicSite/views/COVID-19Summary\\_16222279737570/COVID-19Summary?%3AshowAppBanner=false&%3Adisplay\\_count=n&%3AshowVizHome=n&%3Aorigin=viz\\_share\\_link&%3AisGuestRedirectFromVizportal=y&%3Aembed=y](https://tableau.alleghenycounty.us/t/PublicSite/views/COVID-19Summary_16222279737570/COVID-19Summary?%3AshowAppBanner=false&%3Adisplay_count=n&%3AshowVizHome=n&%3Aorigin=viz_share_link&%3AisGuestRedirectFromVizportal=y&%3Aembed=y) (June 13, 2023),
2. Variants and Genomic Surveillance for SARS-CoV-2 in Allegheny County. [https://tableau.alleghenycounty.us/t/PublicSite/views/COVID-19-VariantandGenomicSurveillance\\_16523720460910/VariantsandGenomicSurveillanceforSARS-CoV-2?%3Aembed=y&%3AshowAppBanner=false&%3Adisplay\\_count=n&%3AshowVizHome=n&%3Aorigin=viz\\_share\\_link](https://tableau.alleghenycounty.us/t/PublicSite/views/COVID-19-VariantandGenomicSurveillance_16523720460910/VariantsandGenomicSurveillanceforSARS-CoV-2?%3Aembed=y&%3AshowAppBanner=false&%3Adisplay_count=n&%3AshowVizHome=n&%3Aorigin=viz_share_link) (June 13, 2023),
